# Supplementary figures and images for: In vitro effect of green tea and turmeric extracts on GLP-1 and CCK secretion: the effect of gastrointestinal digestion
Source: Royal Society of Chemistry journal article supplement (doi:10.1039/c8fo01334a), 2018-01-01

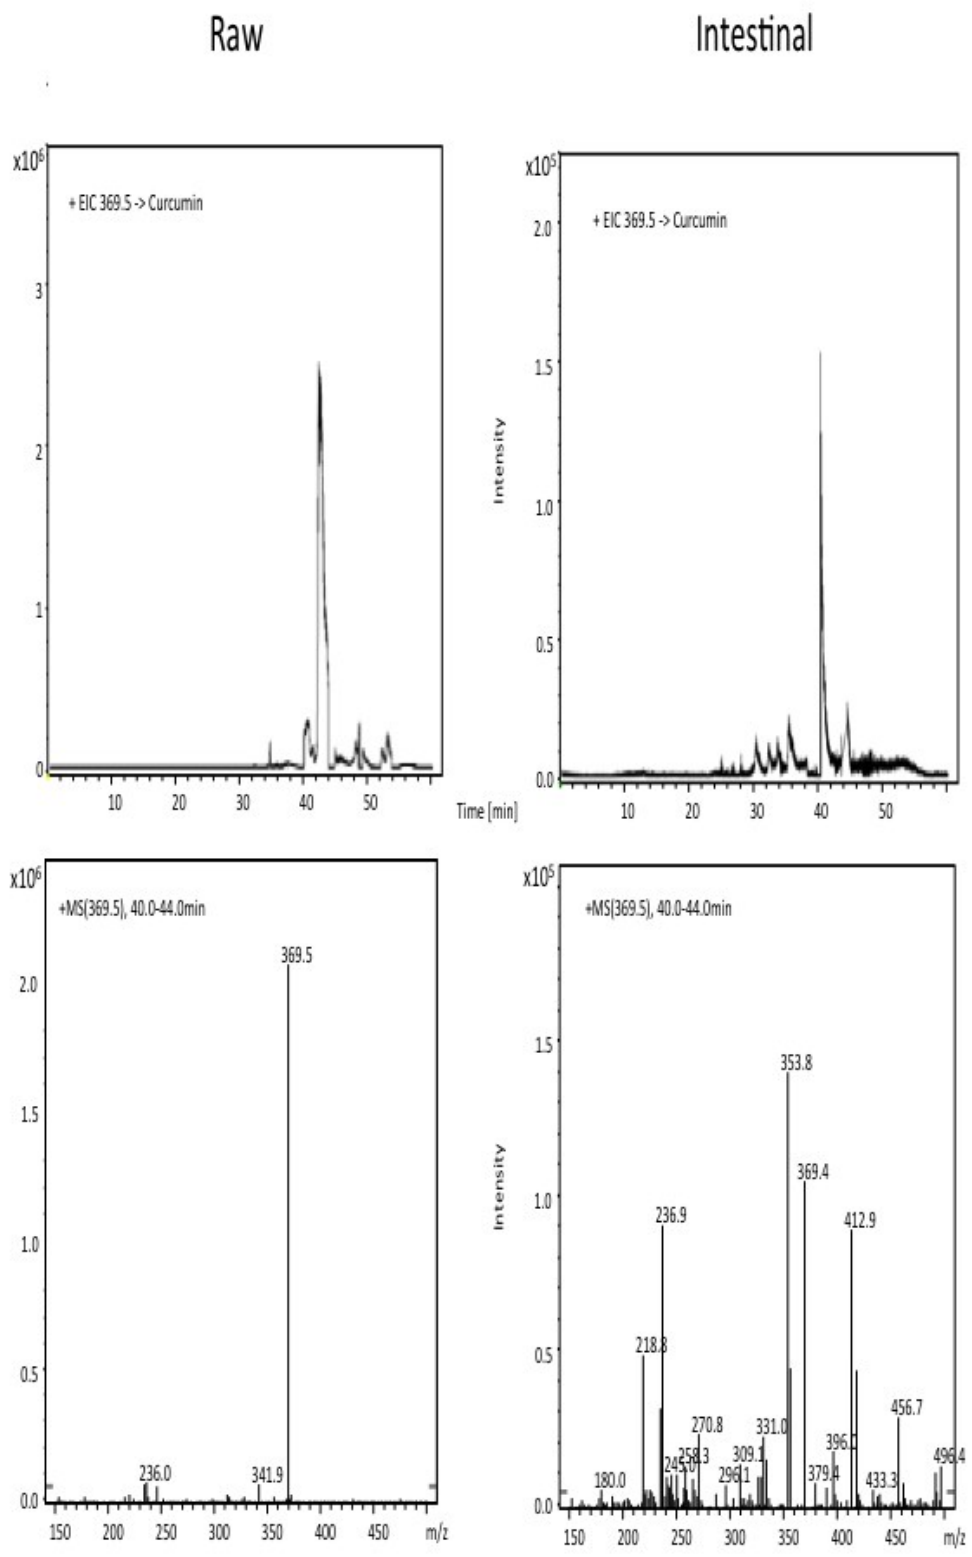

Figure S1.

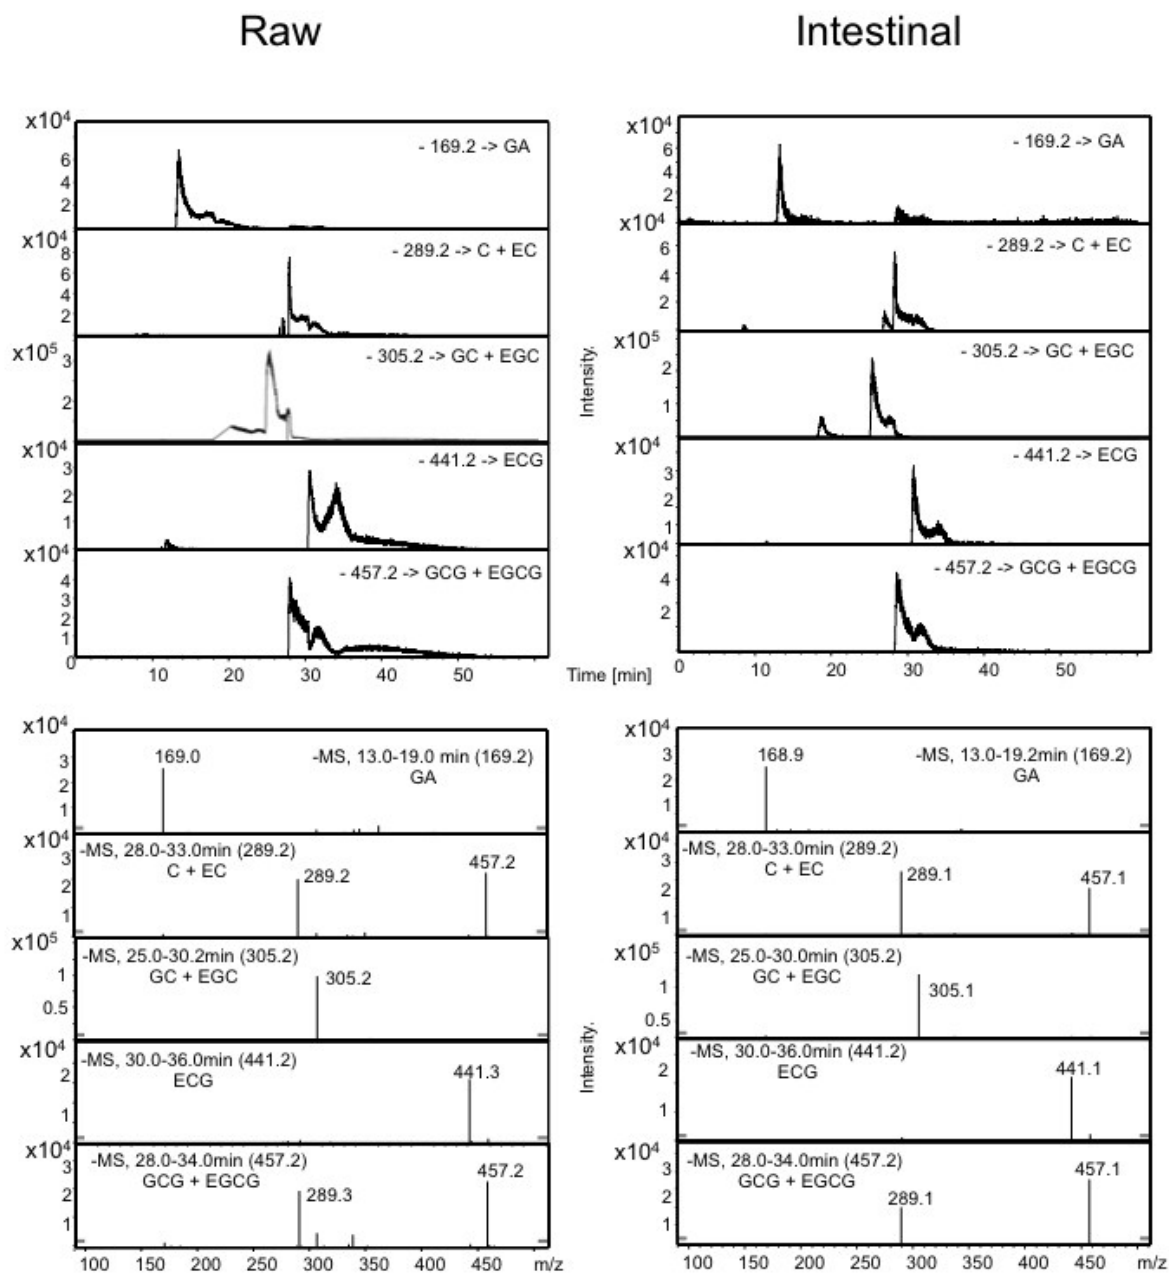

Figure S2.

Supplement: c8fo01334a1.pdf [file c8fo01334a1.pdf]
